# Supplementary material
Source: PubMed Central journal article supplement (PMC10566504)
Supplement: NIHMS1935254-supplement-Supplemental_Table_1.pdf [file NIHMS1935254-supplement-Supplemental_Table_1.pdf]

**Supplemental Table 1. Serial Changes of Circumpapillary RNFL Thickness and CD Compared to the Baseline Measurements (Negative Pressure = 0 mmHg, N = 24 eyes) after Age and SSI adjustment**

| Negative Pressure (mmHg) | RNFL thickness ( $\mu\text{m}$ ) change (95% CI) | <i>P</i> value* | CD (%) change (95% CI) | <i>P</i> value* |
|--------------------------|--------------------------------------------------|-----------------|------------------------|-----------------|
| -5                       | 0.09 (-1.36, 1.54)                               | 0.905           | 0.77 (-0.84, 2.37)     | 0.349           |
| -10                      | -1.17 (-2.68, 0.34)                              | 0.128           | 1.69 (0.02, 3.36)      | <b>0.047</b>    |
| -15                      | -0.84 (-2.38, 0.69)                              | 0.282           | 1.70 (0.00, 3.40)      | <b>0.050</b>    |
| -20                      | -1.02 (-2.61, 0.58)                              | 0.212           | 2.02 (0.26, 3.79)      | <b>0.025</b>    |
| -15                      | -0.87 (-2.34, 0.61)                              | 0.250           | 1.94 (0.31, 3.57)      | <b>0.020</b>    |
| -10                      | 0.20 (-1.27, 1.67)                               | 0.787           | 1.89 (0.27, 3.52)      | <b>0.022</b>    |
| -5                       | -0.39 (-1.89, 1.11)                              | 0.613           | 0.56 (-1.10, 2.22)     | 0.511           |
| 0                        | -0.32 (-1.87, 1.24)                              | 0.691           | 0.26 (-1.46, 1.98)     | 0.769           |

SSI: signal strength index, RNFL: retinal nerve fiber layer, CD: capillary density.

Linear mixed effects model with repeated measures was used to evaluate the statistical significance.

\* Statistically significant *P* values (< 0.05) are shown in bold.
