# Supplementary material
Source: PubMed Central journal article supplement (PMC10566504)
Supplement: NIHMS1935254-supplement-Supplemental_Table_2.pdf [file NIHMS1935254-supplement-Supplemental_Table_2.pdf]

**Supplemental Table 2. The Association between MD and Serial Changes of Circumpapillary CD at Various Levels of Negative Pressure During the “Ramp-up” and “Ramp-down” Schedule (N = 24 eyes)**

| <b>Negative Pressure (mmHg)</b> | <b>Coefficient (%/dB) (95% CI)</b> | <b>P value*</b> |
|---------------------------------|------------------------------------|-----------------|
| -5                              | 0.51 (-0.60, 1.62)                 | 0.365           |
| -10                             | 0.52 (-0.59, 1.63)                 | 0.360           |
| -15                             | 0.57 (-0.54, 1.68)                 | 0.312           |
| -20                             | 0.01 (-1.10, 1.12)                 | 0.988           |
| -15                             | 0.56 (-0.55, 1.67)                 | 0.323           |
| -10                             | 0.35 (-0.76, 1.46)                 | 0.535           |
| -5                              | 0.64 (-0.47, 1.75)                 | 0.259           |
| 0                               | 0.23 (-0.88, 1.34)                 | 0.682           |

MD: mean deviation, CD: capillary density.

Linear mixed effects model with repeated measures was used to evaluate the association between MD and circumpapillary CD at various levels of negative pressure.
