# Supplementary material
Source: PubMed Central journal article supplement (PMC10566504)
Supplement: NIHMS1935254-supplement-Supplemental_Table_3.pdf [file NIHMS1935254-supplement-Supplemental_Table_3.pdf]

**Supplemental Table 3. Serial Changes of the Difference between the Superior and Inferior Hemifield Measurements Compared to their Respective Baseline Difference (Negative Pressure = 0 mmHg, N = 24 eyes)**

| Negative Pressure (mmHg) | RNFL thickness ( $\mu\text{m}$ ) change (95% CI) | <i>P</i> value* | CD (%) change (95% CI) | <i>P</i> value* |
|--------------------------|--------------------------------------------------|-----------------|------------------------|-----------------|
| -5                       | -0.18 (-2.13, 1.76)                              | 0.854           | -0.41 (-1.62, 0.79)    | 0.502           |
| -10                      | -1.28 (-3.33, 0.76)                              | 0.218           | -0.70 (-1.96, 0.57)    | 0.281           |
| -15                      | -0.76 (-2.84, 1.32)                              | 0.472           | -0.35 (-1.64, 0.94)    | 0.592           |
| -20                      | -1.24 (-3.36, 0.88)                              | 0.252           | -0.70 (-2.02, 0.61)    | 0.292           |
| -15                      | -1.43 (-3.45, 0.59)                              | 0.165           | -0.23 (-1.48, 1.02)    | 0.720           |
| -10                      | -0.81 (-2.85, 1.24)                              | 0.441           | 0.40 (-0.87, 1.67)     | 0.537           |
| -5                       | -0.83 (-2.87, 1.20)                              | 0.420           | -0.30 (-1.56, 0.96)    | 0.639           |
| 0                        | -1.43 (-3.53, 0.66)                              | 0.180           | 0.01 (-1.28, 1.31)     | 0.983           |

RNFL: retinal nerve fiber layer, CD: capillary density.

Linear mixed effects model with repeated measures was used to evaluate the statistical significance.
